# Supplementary material for: Efficient Exciplex-Based Deep-Blue Organic Light-Emitting Diodes Employing a Bis(4-fluorophenyl)amine-Substituted Heptazine Acceptor
Source: MDPI journal article supplement (doi:10.3390/molecules26185568), 2021-09-13
Supplement: s1 [file s1]

## *Supplementary Materials*

# **Efficient Exciplex-Based Deep-Blue Organic Light-Emitting Diodes Employing a Bis(4-fluorophenyl) amine-Substituted Heptazine Acceptor**

Jie Li <sup>1</sup>, Heqi Gong <sup>1</sup>, Jincheng Zhang <sup>1</sup>, Hui Liu <sup>1</sup>, Li Tao <sup>1</sup>, Yanqing Wang <sup>2</sup> and Qiang Guo <sup>1,\*</sup>

<sup>1</sup>*College of Optoelectronic Engineering, Chengdu University of Information Technology, Chengdu 610225, China*

<sup>2</sup>*College of Polymer Science and Engineering, Sichuan University, Chengdu 610065, China*

*\*Correspondence: qiangguo@cuit.edu.cn*

## **Table of Contents**

### **1. Instrumentation**

### **2. Quantum Chemical Calculations**

### **3. Photophysical Properties**

### **4. <sup>1</sup>H and <sup>13</sup>C NMR spectra of HAP-3FDPA**

### **5. References**

## 1. Instrumentation

NMR spectra were obtained on a Varian Inova 400 spectrometer. The  $^1\text{H}$  NMR (400 MHz) and  $^{13}\text{C}$  NMR (100 MHz) chemical shifts were measured relative to DMSO- $d_6$  as the internal reference (DMSO- $d_6$ :  $\delta = 2.50$  ppm for  $^1\text{H}$  and  $\delta = 39.52$  ppm for  $^{13}\text{C}$  respectively). High-resolution mass spectra (HRMS) were obtained with Waters-Q-TOF-Premier (ESI $^+$ ). The UV and PL spectra were recorded with a Shimadzu UV-2550 spectrophotometer and Shimadzu RF-5301PC fluorescence spectrometer, respectively. The PLQY and transient PL decay were recorded using a Hamamatsu C9920-02 and a Hamamatsu C11367-03 measurement system, respectively. Transient PL decay characteristics of film samples under vacuum conditions were measured on a streak camera (C4334, Hamamatsu Photonics) equipped with cryostat using a YAG laser. The highest occupied molecular orbital (HOMO) energy levels of HAP-3FDPA and mCP were determined by atmospheric ultraviolet photoelectron spectroscopy (AC-3E, Riken Keiki), and the corresponding lowest unoccupied molecular orbital (LUMO) levels were calculated by subtracting the energy gaps from the HOMO levels. Oxygen-free sample solutions ( $1 \times 10^{-4}$  mol L $^{-1}$ ) were degassed with N $_2$  for 15 min prior to use unless otherwise indicated. Pure and doped films were deposited on quartz and silicon substrates by vacuum thermal evaporation at a pressure lower than  $5 \times 10^{-4}$  Pa.

## 2. Quantum Chemical Calculations

All calculations were performed using the Gaussian 09 program package. The HOMO and LUMO of HAP-3FDPA were calculated using the nonlocal density functional of Becke's 3-parameters employing Lee-Yang-Parr functional (B3LYP) with the 6-31G(d) basis set. Their  $S_1$  and  $T_1$  were calculated by the time-dependent density functional theory (TD-DFT) method at the optimized ground-state geometries using the B3LYP mode with a 6-31G(d) basis set [S1].

### 2.1 The Optimized Geometry Data for HAP-3FDPA (unit: Å)

|   |             |             |             |
|---|-------------|-------------|-------------|
| C | -7.01210465 | -1.70088527 | -0.09624241 |
| C | -6.54392461 | -2.42884946 | 0.99099161  |
| C | -5.18769035 | -2.74392982 | 1.05169564  |
| C | -4.31985395 | -2.33820662 | 0.03287356  |
| C | -4.81732526 | -1.61455175 | -1.05631107 |
| C | -6.16925764 | -1.28681791 | -1.12185208 |
| N | -2.93472063 | -2.72478931 | 0.09912647  |
| C | -1.92679378 | -1.79004971 | 0.06266245  |
| N | -2.30715943 | -0.49936494 | 0.06483414  |
| C | -1.34478238 | 0.41434050  | 0.02839837  |
| N | 0.00081352  | -0.00108659 | -0.00452858 |
| C | 0.31406057  | -1.37413160 | -0.00100236 |

|   |             |             |             |
|---|-------------|-------------|-------------|
| N | -0.66886392 | -2.26584232 | 0.02838510  |
| N | -1.62512233 | 1.71193362  | 0.02946096  |
| C | -0.58385735 | 2.56328517  | -0.00495091 |
| N | 0.72343172  | 2.24719198  | -0.04221759 |
| C | 1.03337410  | 0.95637302  | -0.04056061 |
| N | 2.29677222  | 0.55019137  | -0.07752022 |
| C | 2.51368560  | -0.77765666 | -0.06913366 |
| N | 1.58637309  | -1.75152253 | -0.02736657 |
| N | -0.88960003 | 3.90391712  | 0.00001975  |
| N | 3.82691654  | -1.18377219 | -0.10528852 |
| C | 4.18567442  | -2.57485716 | -0.19601790 |
| C | -2.25125892 | 4.36642864  | -0.06201825 |
| C | 0.13570589  | 4.91146572  | 0.07147079  |
| C | 0.17934428  | 5.90659226  | -0.91033295 |
| C | 1.12686065  | 6.92631973  | -0.84109708 |
| C | 2.02792346  | 6.92975838  | 0.21672683  |
| C | 2.00453309  | 5.95186607  | 1.20515365  |
| C | 1.04784761  | 4.94250341  | 1.13213814  |
| C | 5.06032418  | -3.11228057 | 0.75410718  |
| C | 5.46674172  | -4.44259541 | 0.66802628  |
| C | 4.98153466  | -5.22290662 | -0.37438456 |
| C | 4.11195608  | -4.71167451 | -1.33153914 |
| C | 3.71947132  | -3.37843805 | -1.24258944 |
| C | -2.72146608 | 5.22751784  | 0.93470183  |
| C | -4.01875562 | 5.73336662  | 0.87659541  |
| C | -4.83381111 | 5.36056633  | -0.18536947 |
| C | -4.38922116 | 4.50651090  | -1.18870822 |
| C | -3.08817211 | 4.01361846  | -1.12642164 |
| C | -2.65736913 | -4.13314665 | 0.20473396  |
| C | -1.88947322 | -4.64537068 | 1.25672480  |
| C | -1.66707844 | -6.01622747 | 1.36004503  |
| C | -2.23044581 | -6.86330705 | 0.41207618  |
| C | -3.00539187 | -6.38035978 | -0.63537029 |
| C | -3.21385017 | -5.00603874 | -0.73602622 |
| F | -8.32315558 | -1.39068935 | -0.16174329 |
| F | -2.02204708 | -8.19209959 | 0.51488909  |
| F | -6.09129465 | 5.84454633  | -0.24751864 |
| F | 5.36837973  | -6.51215519 | -0.46302700 |
| F | 2.94908957  | 7.91236184  | 0.28992221  |
| C | 4.90919046  | -0.23596968 | -0.05527479 |
| C | 5.86730127  | -0.24648730 | -1.07405501 |
| C | 6.95483868  | 0.62383891  | -1.02984155 |
| C | 7.06304638  | 1.50315745  | 0.04075836  |
| C | 6.12371903  | 1.53255441  | 1.06570800  |
| C | 5.04551476  | 0.65238141  | 1.01704185  |

|   |             |             |             |
|---|-------------|-------------|-------------|
| F | 8.11195924  | 2.34974584  | 0.09027066  |
| H | -7.23240564 | -2.73364195 | 1.77192129  |
| H | -4.79930230 | -3.31137400 | 1.89137647  |
| H | -4.14295479 | -1.29705541 | -1.84307353 |
| H | -6.57473701 | -0.72186797 | -1.95444495 |
| H | -0.53395358 | 5.88351415  | -1.72798066 |
| H | 1.17654925  | 7.70587354  | -1.59383376 |
| H | 2.72408632  | 5.99140662  | 2.01601183  |
| H | 1.01704570  | 4.16893257  | 1.89046405  |
| H | 5.42705649  | -2.48482274 | 1.56014245  |
| H | 6.14390603  | -4.87656476 | 1.39600747  |
| H | 3.75599282  | -5.35283854 | -2.13089287 |
| H | 3.03726748  | -2.96480002 | -1.97573888 |
| H | -2.06734996 | 5.50472066  | 1.75517260  |
| H | -4.40150230 | 6.40140199  | 1.64080597  |
| H | -5.05617951 | 4.24114400  | -2.00207410 |
| H | -2.72484995 | 3.34235076  | -1.89576933 |
| H | -1.45296575 | -3.97024444 | 1.98308750  |
| H | -1.06904595 | -6.43199335 | 2.16395656  |
| H | -3.42867850 | -7.07191512 | -1.35608463 |
| H | -3.81575089 | -4.60759734 | -1.54642550 |
| H | 5.76216767  | -0.94167051 | -1.90084521 |
| H | 7.70741250  | 0.63111340  | -1.81109406 |
| H | 6.24540180  | 2.23291318  | 1.88515984  |
| H | 4.29993582  | 0.66339222  | 1.80349778  |

## 2.2 Excitation Energies and Oscillator Strengths for HAP-3FDPA

Excited State 1: Triplet-A 3.2734 eV 378.77 nm f=0.0000

|           |          |
|-----------|----------|
| 198 → 202 | 0.11849  |
| 198 → 203 | 0.10932  |
| 199 → 201 | 0.42667  |
| 199 → 203 | -0.11350 |
| 200 → 201 | 0.45364  |
| 200 → 202 | -0.12793 |

Excited State 2: Triplet-A 3.2746 eV 378.62 nm f=0.0000

|           |          |
|-----------|----------|
| 198 → 202 | 0.10563  |
| 198 → 203 | -0.12371 |
| 199 → 201 | 0.45332  |
| 199 → 202 | 0.13109  |
| 200 → 201 | -0.42716 |
| 200 → 203 | -0.10262 |

Excited State 3: Triplet-A 3.3514 eV 369.95 nm f=0.0000

|           |         |
|-----------|---------|
| 198 → 201 | 0.57236 |
| 199 → 202 | 0.21785 |

|                            |           |           |          |  |  |
|----------------------------|-----------|-----------|----------|--|--|
| 200 → 203                  | 0.23633   |           |          |  |  |
| 200 → 213                  | 0.10649   |           |          |  |  |
| Excited State 4: Triplet-A | 3.5277 eV | 351.46 nm | f=0.0000 |  |  |
| 197 → 201                  | 0.55171   |           |          |  |  |
| 198 → 208                  | -0.15420  |           |          |  |  |
| 199 → 203                  | -0.14323  |           |          |  |  |
| 199 → 209                  | 0.16301   |           |          |  |  |
| 200 → 202                  | 0.14113   |           |          |  |  |
| 200 → 207                  | 0.15575   |           |          |  |  |
| Excited State 5: Singlet-A | 3.5639 eV | 347.89 nm | f=0.0000 |  |  |
| 197 → 201                  | 0.67884   |           |          |  |  |
| Excited State 6: Singlet-A | 3.6477 eV | 339.89 nm | f=0.3930 |  |  |
| 200 → 201                  | 0.67448   |           |          |  |  |
| Excited State 7: Singlet-A | 3.6811 eV | 336.81 nm | f=0.4048 |  |  |
| 199 → 201                  | 0.67851   |           |          |  |  |
| Excited State 8: Singlet-A | 3.6876 eV | 336.22 nm | f=0.0009 |  |  |
| 198 → 201                  | 0.64391   |           |          |  |  |

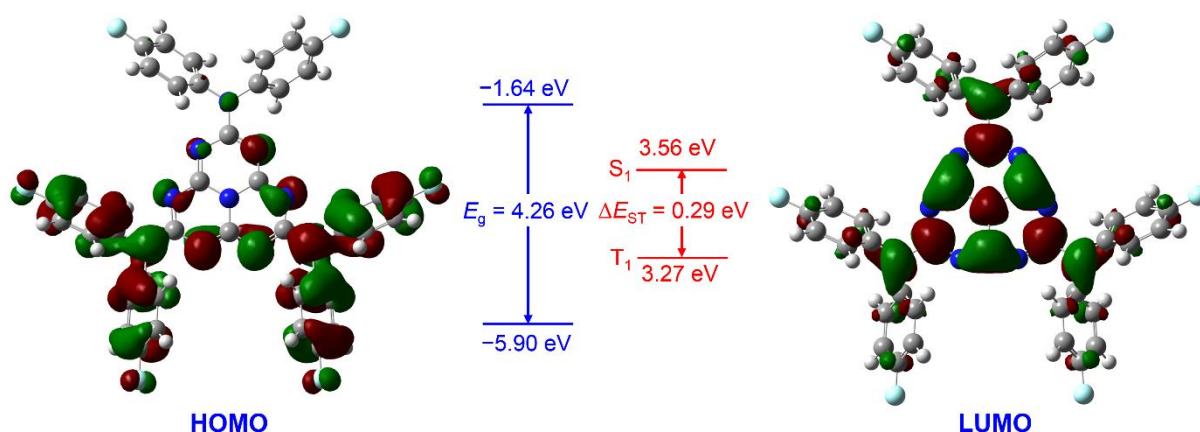

**Figure S1.** Frontier molecular orbital distributions and energy levels of the lowest excited singlet and triplet states of HAP-3FDPA by theoretical calculations.

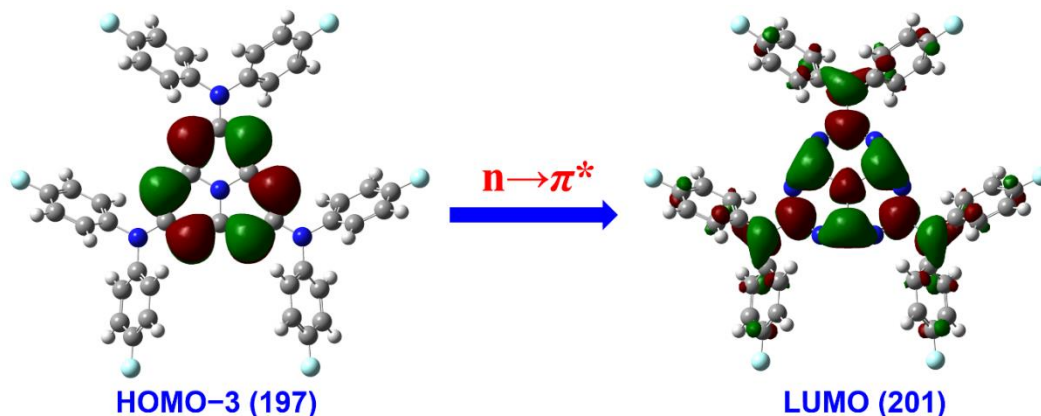

**Figure S2.** The natural transition orbitals (197 → 201) for the lowest excited singlet state ( $S_1$ ) of HAP-3FDPA by theoretical calculations.

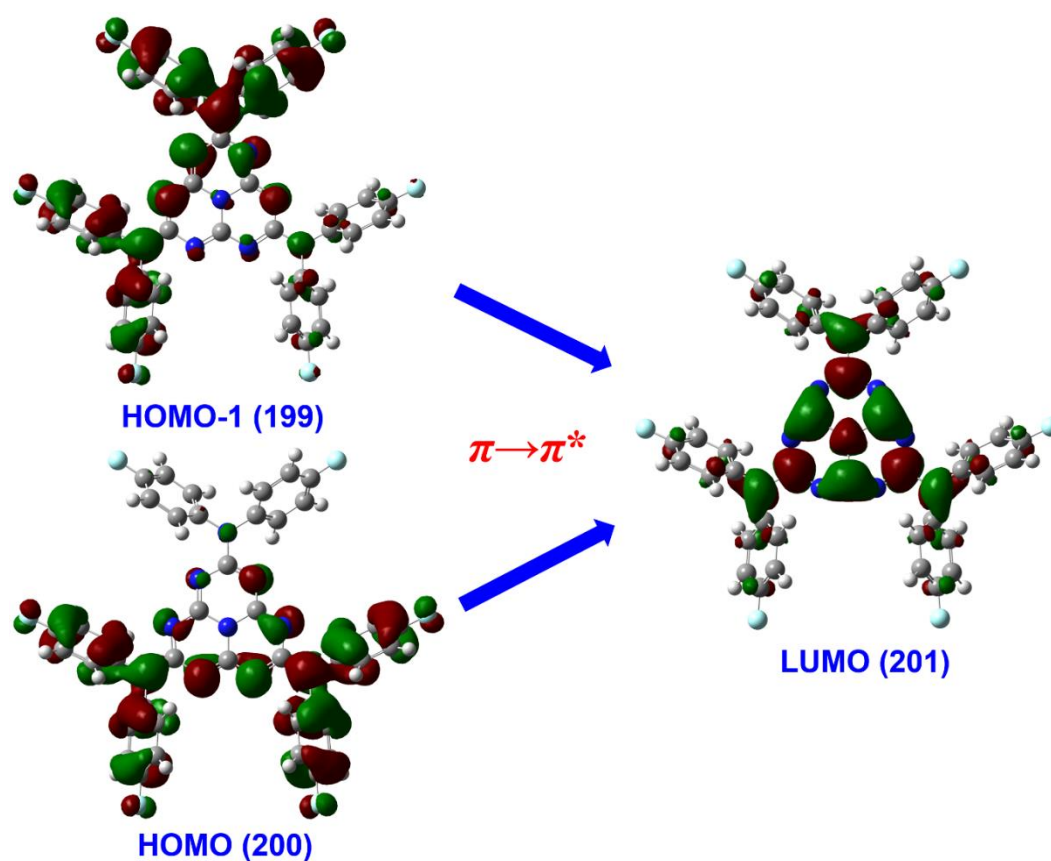

**Figure S3.** The natural transition orbitals (199  $\rightarrow$  201) and (200  $\rightarrow$  201) for the lowest excited triplet state ( $T_1$ ) of HAP-3FDPA by theoretical calculations.

### 3. Photophysical Properties

**Table S1.** The PLQYs of HAP-3FDPA:mCP doped films at various concentrations.

| Concentration         | PLQY  |
|-----------------------|-------|
| 8 wt% HAP-3FDPA:mCP   | 53.2% |
| 25 wt% HAP-3FDPA:mCP  | 41.6% |
| 50 wt% HAP-3FDPA:mCP  | 37.1% |
| 100 wt% HAP-3FDPA:mCP | 5.1%  |

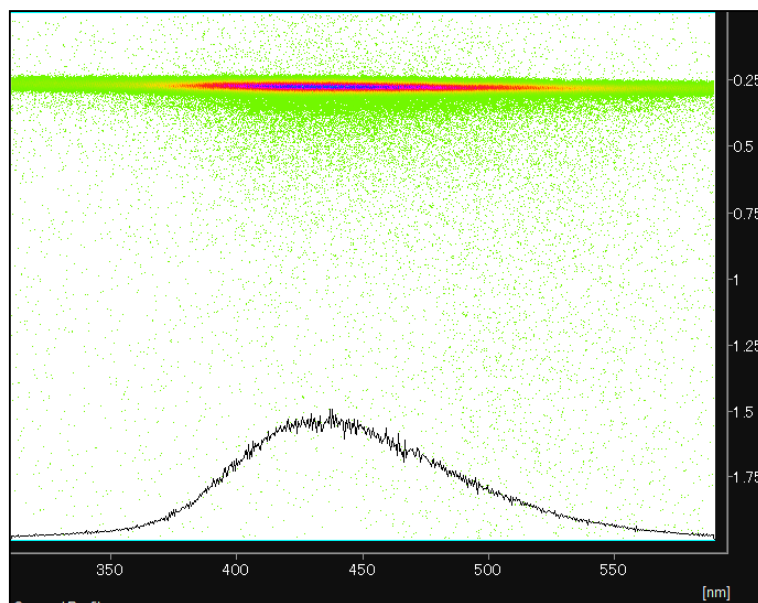

**Figure S4.** The transient PL decay image of 8 wt% HAP-3FDPA:mCP doped film in the time range of 2  $\mu$ s.

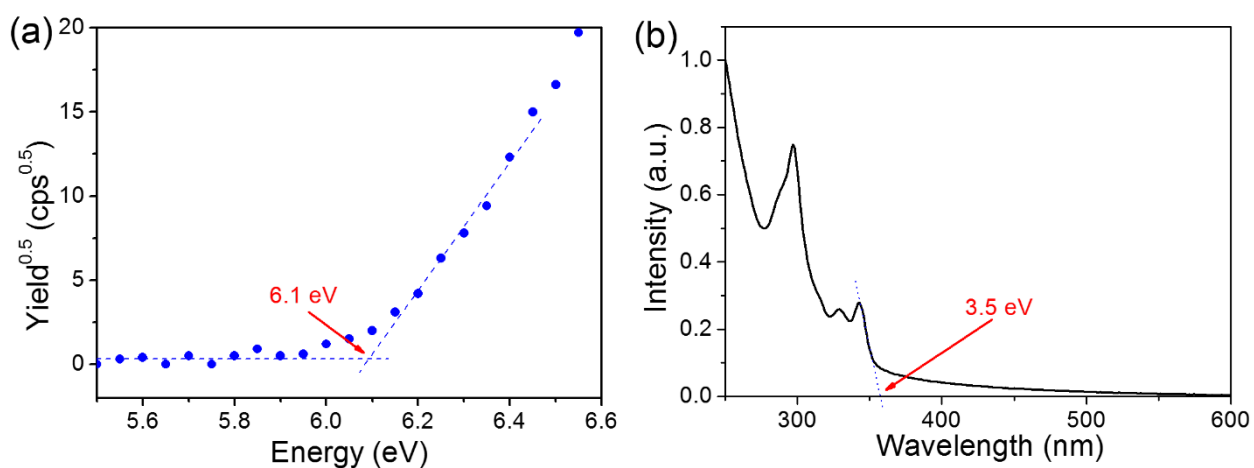

**Figure S5.** (a) The HOMO energy level of mCP determined by atmospheric ultraviolet photoelectron spectroscopy. (b) The UV spectra of mCP in a neat film. The optical energy gap of mCP was calculated to be 3.5 eV. Therefore, the LUMO energy level of mCP could be calculated to be  $-2.6$  eV.

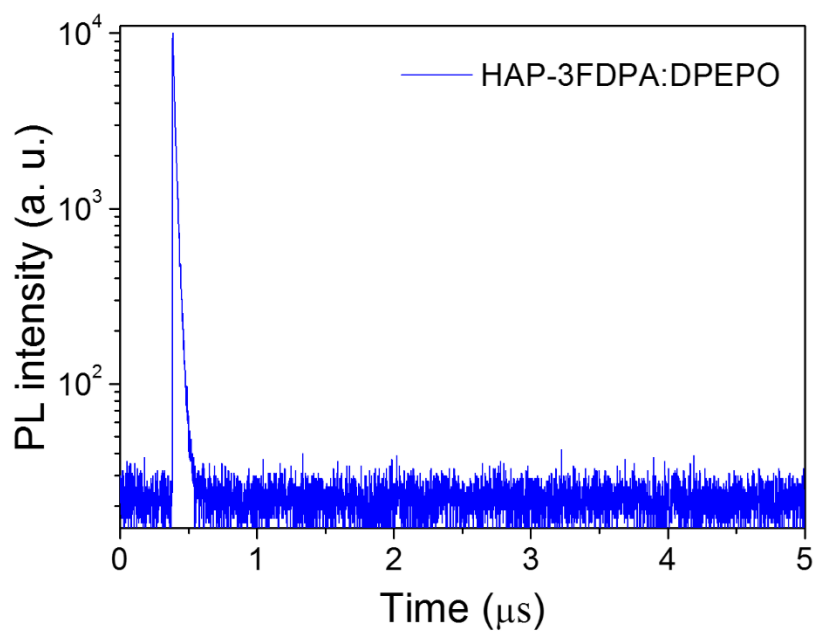

**Figure S6.** The transient PL decay of 8 wt% HAP-3FDPA:DPEPO doped film in the time range of 5  $\mu$ s.

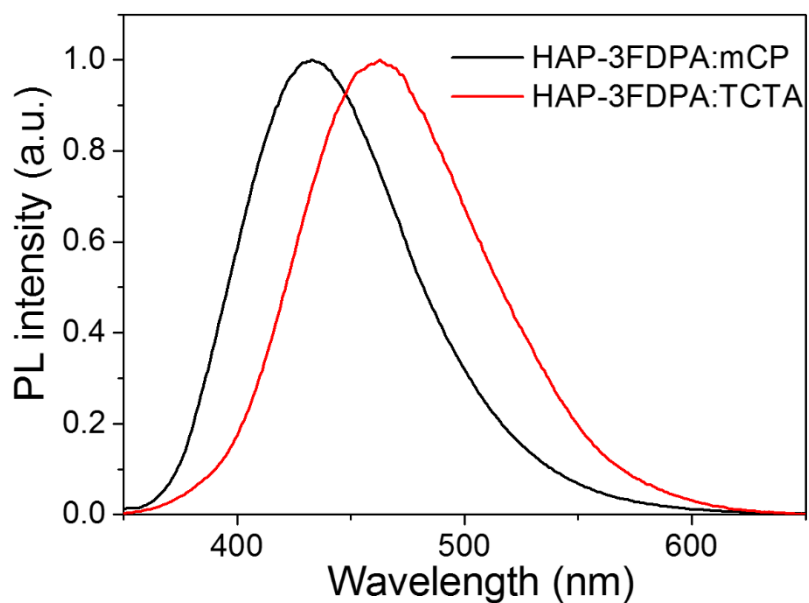

**Figure S7.** The PL spectrum of 8 wt% HAP-3FDPA:TCTA doped film as compared to that of 8 wt% HAP-3FDPA:mCP.

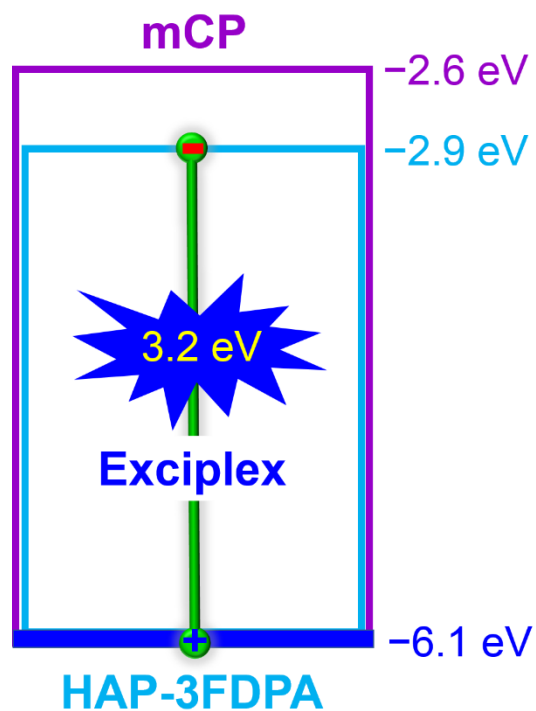

**Figure S8.** The energy diagram of the 8 wt% HAP-3FDPA:mCP exciplex system.

#### 4. $^1\text{H}$ and $^{13}\text{C}$ NMR spectra of HAP-3FDPA

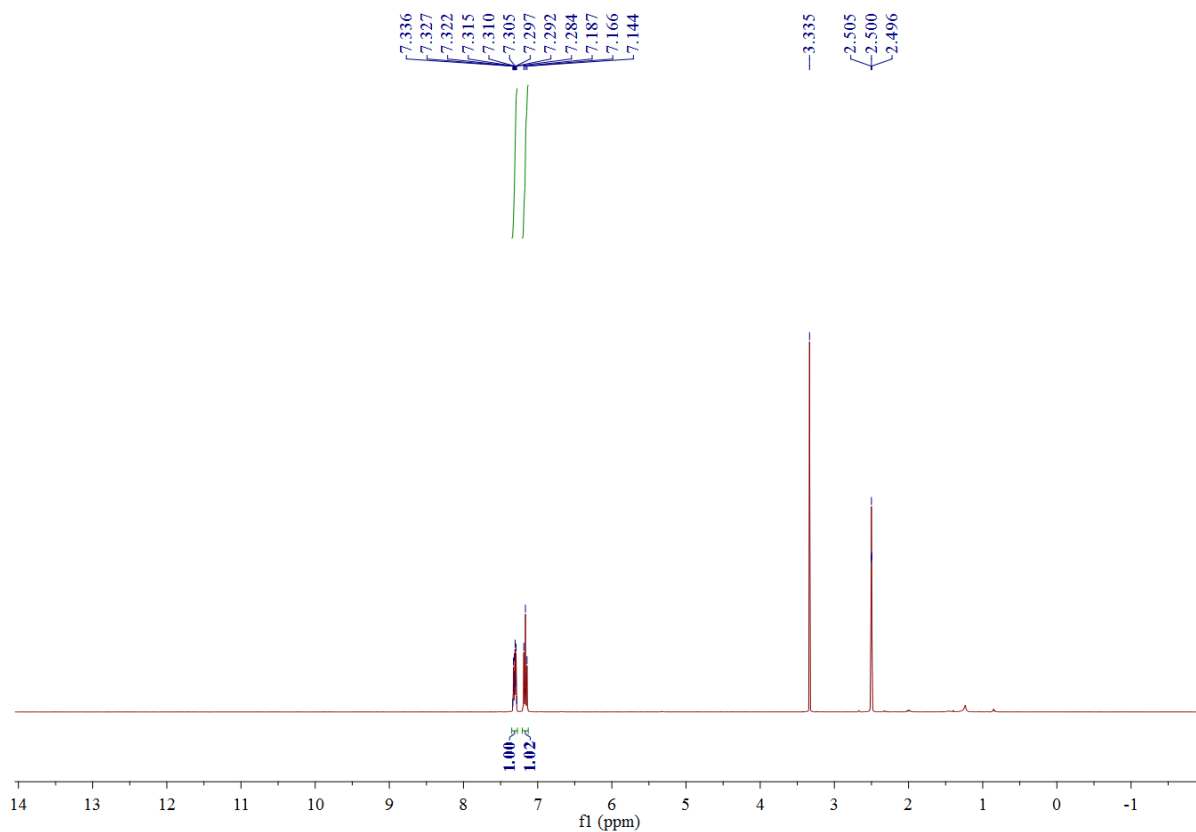

**Figure S9.**  $^1\text{H}$  NMR spectrum of HAP-3FDPA in  $\text{DMSO-}d_6$ .

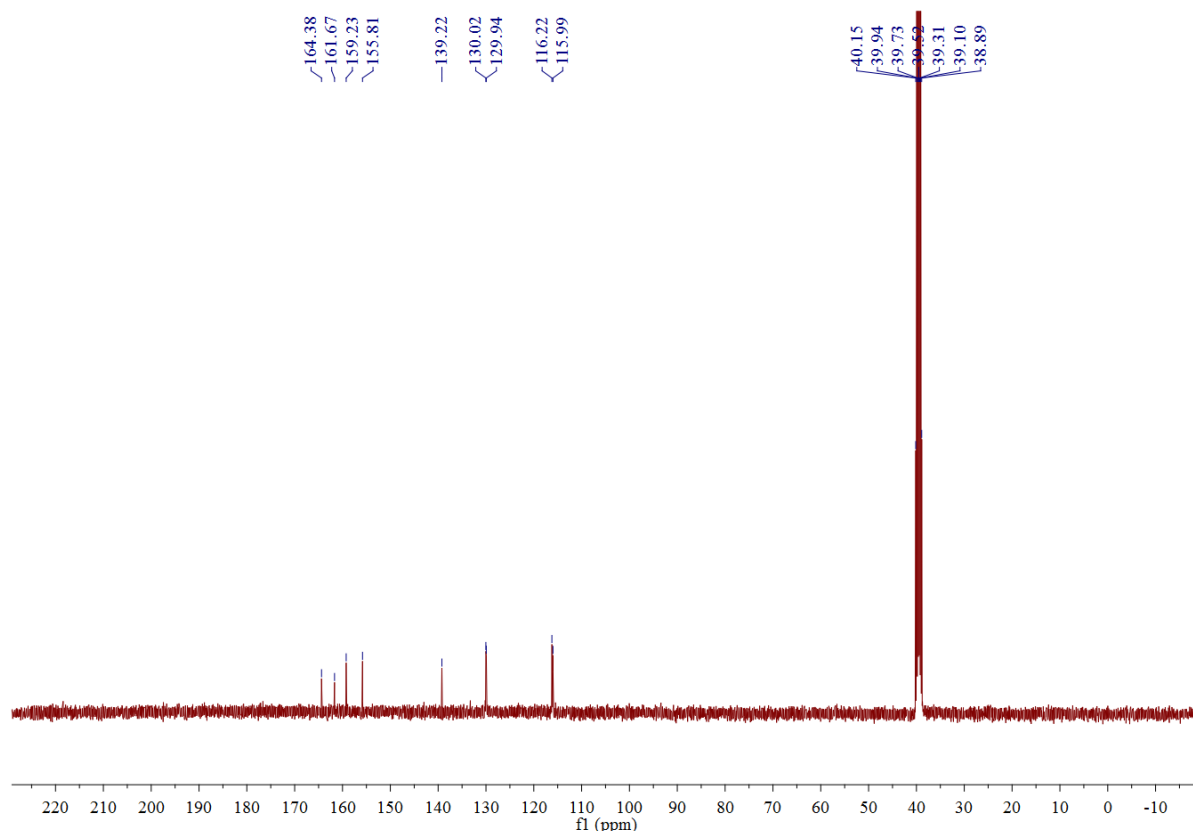

**Figure S10.**  $^{13}\text{C}$  NMR spectrum of HAP-3FDPA in  $\text{DMSO-}d_6$ .

## 5. References

- S1 M. J. Frisch, G. W. Trucks, H. B. Schlegel, G. E. Scuseria, M. A. Robb, J. R. Cheeseman, G. Scalmani, V. Barone, B. Mennucci, G. A. Petersson, H. Nakatsuji, M. Caricato, X. Li, H. P. Hratchian, A. F. Izmaylov, J. Bloino, G. Zheng, J. L. Sonnenberg, M. Hada, M. Ehara, K. Toyota, R. Fukuda, J. Hasegawa, M. Ishida, T. Nakajima, Y. Honda, O. Kitao, H. Nakai, T. Vreven, J. A. Montgomery, Jr., J. E. Peralta, F. Ogliaro, M. Bearpark, J. J. Heyd, E. Brothers, K. N. Kudin, V. N. Staroverov, R. Kobayashi, J. Normand, K. Raghavachari, A. Rendell, J. C. Burant, S. S. Iyengar, J. Tomasi, M. Cossi, N. Rega, J. M. Millam, M. Klene, J. E. Knox, J. B. Cross, V. Bakken, C. Adamo, J. Jaramillo, R. Gomperts, R. E. Stratmann, O. Yazyev, A. J. Austin, R. Cammi, C. Pomelli, J. W. Ochterski, R. L. Martin, K. Morokuma, V. G. Zakrzewski, G. A. Voth, P. Salvador, J. J. Dannenberg, S. Dapprich, A. D. Daniels, Ö. Farkas, J. B. Foresman, J. V. Ortiz, J. Cioslowski, and D. J. Fox, *Gaussian 09, Revision C.01*. (Gaussian, Inc., 2009).
